1 **Bacterial gene essentiality under modeled microgravity**

2  
3  
4  
5  
6  
7  
8  
9  
10  
11  
12  
13  
14  
15  
16  
17  
18  
19  
20  
21  
22  
23  
24  
25  
26  
27  
28  
29  
30  
31  
32  
33  
34  
35  
36  
37  
38  
39  
40  
41  
42  
43

Emanuel Burgos<sup>1</sup>, Madeline M. Vroom<sup>2</sup>, Ella Rotman<sup>3§</sup>, Megan Murphy-Belcaster<sup>3†</sup>, Jamie S. Foster<sup>2</sup>, Mark J. Mandel<sup>1,3,\*</sup>

<sup>1</sup> Department of Medical Microbiology and Immunology, University of Wisconsin-Madison, Madison, WI USA

<sup>2</sup> Department of Microbiology and Cell Science, Space Life Science Lab, University of Florida, Merritt Island, FL USA

<sup>3</sup> Department of Microbiology-Immunology, Northwestern University Feinberg School of Medicine, Chicago, IL USA

§ Current Address: Department of Microbiology, University of Chicago, Chicago, IL USA

† Current Address: University of Wisconsin-Madison School of Medicine and Public Health, Madison, WI USA

Short title: *Vibrio fischeri* modeled microgravity mutant analysis

Keywords: modeled microgravity, essential genes, symbiosis, *Vibrio fischeri*, *Aliivibrio fischeri*, *Euprymna scolopes*, INSeq, Tn-seq

\* Correspondence to:

Mark J. Mandel  
University of Wisconsin-Madison  
Department of Medical Microbiology and Immunology  
1550 Linden Drive  
Madison, WI 53706  
Phone: (608) 261-1170  
Fax: (608) 262-8418  
Email: mmandel@wisc.edu

44 **ABSTRACT**

45

46 The health of eukaryotic hosts is tightly connected to relationships with symbiotic  
47 microorganisms, yet how these relationships develop and evolve during long-duration  
48 spaceflight is not well understood. In this study, we asked what bacterial genes are required for  
49 growth under modeled, or simulated, microgravity conditions compared to normal gravity  
50 controls. To conduct this study, we focused on the marine bacterium *Vibrio fischeri*, which forms  
51 a monospecific symbiosis with the Hawaiian bobtail squid, *Euprymna scolopes*. The symbiosis  
52 has been studied during spaceflight and in ground-based modeled microgravity conditions. We  
53 employed a library of over 40,000 *V. fischeri* transposon mutants and compared the fitness of  
54 mutants in modeled microgravity compared to the gravity controls using transposon insertion  
55 sequencing (INSeq). We identified dozens of genes that exhibited fitness defects under both  
56 conditions, likely due to the controlled anaerobic environment, yet we identified relatively few  
57 genes with differential effects under modeled microgravity or gravity specifically: only mutants in  
58 *rodA* were more depleted under modeled microgravity, and mutants in 12 genes exhibited  
59 greater depletion under gravity conditions. We additionally compared RNA-seq and INSeq data  
60 and determined that expression under microgravity was not predictive of the essentiality of a  
61 given gene. In summary, empirical determination of conditional gene essentiality identifies few  
62 microgravity-specific genes for environmental growth of *V. fischeri*, suggesting that the condition  
63 of microgravity has a minimal impact on symbiont gene requirement.

64

65 **IMPORTANCE**

66

67 There is substantial evidence that both the host immune system and microbial physiology are  
68 altered during space travel. It is difficult to discern the molecular mechanisms of these  
69 processes in a complex microbial consortium and during the short durations of experiments in  
70 space. By using a model organism that is amenable to high-throughput genetic approaches, we  
71 have determined that *V. fischeri* does not require a separate genetic repertoire for media growth  
72 in modeled microgravity versus gravity conditions. Our results argue that future studies on how  
73 this organism forms a specific and stable association with its animal host will not be confounded  
74 by growth effects in the environment. The identification of similar genetic requirements under  
75 modeled microgravity and gravity suggest that fitness pressures on microbiome growth in space  
76 may be similar to those on Earth and may not negatively impact their animal hosts during long-  
77 duration spaceflight.

78

79

80

81 **INTRODUCTION**

82

83 During spaceflight, microbes--and microbe-host relationships--are altered, and understanding  
84 the mechanisms of these effects are critical as people, plants, and animals spend more time in  
85 space (1–7). To address this issue, experiments are needed to examine bacterial growth,  
86 bacterial-host interactions, and host health. Although previous studies using both natural and  
87 modeled microgravity conditions have resulted in a wide range of physiological and genetic  
88 responses, most have primarily targeted pathogenic strains (8, 9). While fewer studies have  
89 examined the effects of microgravity on beneficial microbes, there are recent studies that have  
90 begun to examine this issue (4–6). Given the importance of beneficial microbes to host health,  
91 we sought here to ask a fundamental question of what genes are required for bacterial growth in  
92 microgravity.

93

94 Due to the number of logistical constraints in conducting spaceflight experiments, several  
95 ground-based platforms exist to mimic the low-shear environment of microgravity (10). Rotating  
96 High Aspect-Ratio Vessels (HARVs) represent one such platform; they mimic the low-shear fluid  
97 conditions that occur at low Earth orbit, and have been used for decades to simulate  
98 microgravity environments (11). As cells grow in the HARVs, the hydrodynamic forces within  
99 each vessel offset the effects of gravity and the cells are essentially in “freefall” and maintained  
100 in a constant suspension (Fig. 1). Bacterial strains grown in these low-shear modeled  
101 microgravity (LSMMG) conditions can experience a wide range of different physiological

102 responses, including increases in growth rates, biofilm formation, secondary metabolite  
103 production, environmental stress responses, and antibiotic resistance (6, 12–16).

104

105 The model symbiosis of *Vibrio fischeri* colonization of the light organ of the Hawaiian bobtail  
106 squid, *Euprymna scolopes*, has emerged as a valuable model to study the effects of

107 microgravity on microbiome assembly and function (1). The squid hatches each generation

108 without its bacterial partner, and then proceeds to harvest *V. fischeri* from the seawater (17).

109 The bacteria colonize the dedicated symbiotic light organ of the host, where bioluminescence  
110 from the bacteria is projected downward and camouflages the host in the moonlight (18). This

111 system has been especially valuable to understand the molecular basis by which animals

112 acquire specific microbes from the environment. The bacteria are genetically manipulatable, and

113 the site of colonization can be imaged directly in live animals, enabling studies that have

114 revealed much of the molecular dialogue between the two partners (19–22). The specific

115 relationship--only *V. fischeri*, and only specific strains of *V. fischeri*, can colonize the squid host--

116 provides a strong model system to study animal-microbiome formation, development, and

117 evolution (17). Furthermore, the small size of the host animal and simplicity of the symbiosis has

118 contributed to the value of this system for studying microbiome formation during spaceflight (1,

119 23).

120

121 In this study, we take a complementary approach to previous work on bacterial gene expression

122 under simulated microgravity to ask what genes are required for survival under this condition.

123 Our lab has previously published a study to globally identify *V. fischeri* genes that are essential,  
124 and that are conditionally essential under specific environmental conditions (24). Here we apply  
125 a similar global approach to determine what genes are required for bacterial growth under  
126 simulated microgravity conditions to ascertain the overall impact that microgravity-like conditions  
127 have on symbiont health and physiology.

128

## 129 **RESULTS**

130

131 A number of studies have examined differential-gene expression in beneficial microbes under  
132 microgravity or simulated microgravity conditions, including in the marine bacterium *V. fischeri*  
133 (6). The current study asks a distinct, yet related, question of what genes are differentially  
134 required for growth under simulated microgravity conditions compared to a gravity control  
135 condition. To identify mutants with a competitive growth defect in simulated microgravity, we  
136 applied the transposon insertion sequencing (INSeq/Tn-seq) approach to *V. fischeri* strains  
137 cultivated under HARV conditions in both the LSMMG and gravity positions (Fig. 1) (25, 26). We  
138 started with a characterized mutant library of over 40,000 transposon mutants in *V. fischeri*  
139 strain ES114 (24). The resulting “input” library was introduced into HARV vessels under either  
140 LSMMG or normal gravity conditions (1 x g). We simultaneously examined the mutant library  
141 grown in LSMMG and gravity control conditions after growth for approximately 15 generations,  
142 and each resulting “output” pool of mutants was frozen. A total of six LSMMG biological  
143 replicates and three gravity control replicates were compared to the input library. From each

144 sample, DNA was isolated, from which INSeq libraries were constructed (26). The libraries were  
145 sequenced on an Illumina HiSeq 2000 instrument, and the location of each transposon insertion  
146 was mapped using the pyinseq Python package.

147

148 For each sample, we obtained between  $6.65 - 8.18 \times 10^6$  Illumina reads (Table S1). We  
149 observed similar numbers and patterns of unique transposon hits across the samples tested,  
150 suggesting that the library did not undergo significant bottlenecks during the experiment (Table  
151 S1). Next, for each sample, we examined the normalized transposon insertion counts (CPM;  
152 counts-per-million Illumina reads) in each gene. We compared the similarity of these gene-level  
153 counts across the samples in the analysis using pairwise correlation analysis. All pairwise  
154 comparisons had a high level of similarity (Spearman  $R^2 > 0.95$ ), and the HARV-grown samples  
155 were clearly distinguishable from the input libraries (Fig. 2). Examination of the heat map  
156 suggested little overall differentiation between the LSMMG and gravity samples that were  
157 otherwise grown similarly. We proceeded to compare individual genes that were depleted under  
158 LSMMG, gravity, or both conditions. To identify genes that had significant differential depletion  
159 under modeled microgravity we used DESeq2 to calculate the median representation of each  
160 mutant in the output LSMMG or gravity pools, and plotted those values compared to the input  
161 pool. We focused our analysis on genes that were depleted at least 2-fold in the different  
162 conditions. Genes that did not meet these criteria, genes that were poorly represented in the  
163 input pool, and genes for which a previous study suggested that mutants impaired bacterial  
164 growth were excluded from further analyses (Fig. 3; open black circles). A total of 109 genes

165 exhibited depletion under both LSMMG and gravity conditions (Fig. 3; filled circles). Of these  
166 genes, most were similarly depleted under both conditions. However, there were genes in this  
167 group that had a  $\geq 2$ -fold difference in one condition (LSMMG or gravity) relative to the other:  
168 this includes 10 genes more depleted under gravity and one gene (*rodA*) more depleted under  
169 LSMMG. Furthermore, there were two genes in the analysis that were significantly depleted ( $p <$   
170  $0.05$  from DESeq2 analysis) under gravity conditions and not under LSMMG conditions (*flgD*,  
171 *rfaD*). There were no genes that were only significantly depleted under LSMMG conditions.

172  
173 The above results were derived from an analysis of complex mutant pools with  $> 40,000$   
174 mutants. We therefore sought to determine whether we would observe the same behavior using  
175 one-versus-one competitions between defined mutant strains and the parental strain. We  
176 proceeded to isolate mutant strains that had a depletion from the INSeq analysis, as well as  
177 mutants in two control genes that were not depleted under either condition (*bmQ* and *nhaR*).  
178 Each defined mutant strain was grown in culture, then competed in the HARVs against the  
179 parental strain that carries the LacZ-expressing plasmid pVSV103 (27). The input and output  
180 pools from each experiment were plated onto LBS-Xgal medium, and the ratio of blue:white  
181 colonies in the samples were calculated. A competitive index was calculated to determine the  
182 fitness of each mutant under each condition. Plotted in Figure 4 are the results of this analysis.  
183 Although some differences were observed between the massive INSeq competition and the  
184 defined one-vs-one competitions, there was strong concordance between the INSeq and  
185 defined competition results. All of the genes for which mutants were significantly depleted under



186 INSeq were also substantially depleted in the defined competitions, and the control mutants  
187 exhibited no substantial depletion. Therefore, we conclude that the INSeq analysis can reliably  
188 predict conditional gene requirements in the HARV environment.

189

190 We recently examined bacterial genes for which mRNA levels are induced in the modeled  
191 microgravity condition, compared to gravity controls (6). We analyzed our current study of gene  
192 requirement (i.e., INSeq) with the previous dataset on gene expression (i.e., RNA-Seq) to ask  
193 whether there is a correlation between gene requirement and gene expression. As shown in  
194 Figure 5A, there was no significant correlation between gene requirement and transcript  
195 induction (Pearson  $R^2 = 0.08$ ). Our data above suggest that the HARV platform may play a  
196 more significant role in shaping mutant communities than the specific LSMMG or gravity  
197 conditions. Therefore, we asked whether genes required in the HARV are also induced in the  
198 HARV, when normalized to non-HARV samples. For our INSeq data, we normalized to the input  
199 sample that did not experience the HARV condition, and for RNA-Seq we normalized to  
200 published data on culture-grown *V. fischeri* (28). As shown in Figure 5B-C, there is similarly a  
201 lack of overall correlation between the gene expression and gene requirement (Pearson  $R^2 =$   
202 0.18, 0.11 for Fig. 5B, 5C, respectively). Therefore, we conclude that gene requirement in the  
203 HARV cannot be predicted from transcriptome induction data, emphasizing the need for  
204 empirical determination of gene essentiality.

205

206

207 **DISCUSSION**

208

209 This study provides a global view of *V. fischeri* genes that are required for growth in conditions  
210 that simulate microgravity. Given the prominence of modeled microgravity platforms, such as  
211 HARVs, in examining the impact of spaceflight on animal-microbe interactions, a motivation for  
212 this work was to understand how the basic requirements for bacterial survival and growth are  
213 altered during growth in the HARV platforms. A surprising finding was that there is little  
214 difference in gene requirement under these conditions, despite dramatic differences in gene  
215 expression. These findings, and their implications, are discussed in greater detail below.

216

217 The global data provided by INSeq, along with the comparison of the INSeq data with results  
218 from defined mutants, provided sensitive internal controls to examine growth in multiple HARV  
219 samples. Overall, the data we obtained from HARV samples was highly consistent. As shown in  
220 the heat map in Figure 2, the high correlation of INSeq replicates within a treatment (e.g., for  
221 LSMMG samples) argues that there was no substantial bottleneck during inoculation or growth  
222 in the HARVs. Furthermore, strong correlation between INSeq results and the results with  
223 defined mutants (Fig. 4) provides support that the global data are representative of gene-level  
224 data. In fact, the consistency we observed between vessel replicates was also observed  
225 between HARV LSMMG and gravity samples. The heat map in Fig. 2 coupled with the tight  
226 correlation of the samples in Figure 3 (Pearson  $R^2 = 0.96$ ) illustrate that there was little variation  
227 observed between the LSMMG and gravity conditions. A striking consistency between genes

228 required for bacterial growth under gravity and those required for growth under modeled  
229 microgravity is the major finding from this study. As the *V. fischeri* system is used for more  
230 extensive research on microgravity, this result indicates there will not be a confounding effect of  
231 genes that are simply required for bacterial growth under microgravity. Put another way, in the  
232 future, if genes are identified that are required for colonization under microgravity, they are likely  
233 to be required specifically for interaction with the animal host, and not simply for growth under  
234 this altered gravity condition. Our findings, in concert with previous studies showing limited  
235 changes in gene expression during spaceflight, suggest that spaceflight missions will have  
236 minimal negative consequences on the microbiome.

237

238 Despite the overall patterns of concordance between LSMMG and gravity, there were genes for  
239 which we observed differential effects between the two conditions, as plotted in Figure 3 and  
240 detailed in Table S3. For example, depletion in *rodA* (*mrdB*) under both LSMMG and gravity  
241 was observed, yet the gene was more significantly depleted under LSMMG. RodA is a SEDS-  
242 family peptidoglycan polymerase that has multiple effects on bacterial cell shape and division  
243 (29). This result suggests that differences in bacterial shape under the two different conditions  
244 may impact the genetic requirement for *rodA*, though we note that its absence does affect  
245 growth under both regimes. We additionally identified a number of genes with mutants depleted  
246 under both conditions but that were more significantly depleted under gravity (Figure 3, filled red  
247 dots). Notably, multiple genes for the F0F1-ATPase were depleted under both conditions, but  
248 more so under gravity. Interestingly, prior work in *Escherichia coli* demonstrated that a similar

249 set of genes were essential for aerobic growth in minimal glycerol media, even though the  
250 metabolic model used predicted that they would not be required (30). Together with our results,  
251 this suggests that this subset of genes (*atpA*, *atpB*, *atpC*, *atpF*) may perform a function separate  
252 from the role in ATP synthesis. Finally, there were two genes for which mutants exhibited  
253 significant depletion under gravity but not LSMMG: *flgD* (encoding the hook capping protein  
254 FlgD) and *rfaD* (encoding the LPS biosynthesis enzyme ADP-L-glycero-D-mannoheptose 6-  
255 epimerase). Both genes affect the outer surface of the bacteria, and consistent with the *rodA*  
256 results above, support the idea that the bacterial envelope is most susceptible to differential  
257 effects of gravity.

258

259 It is also important to note that we observed dozens of genes for which mutants exhibited similar  
260 depletion under both LSMMG and gravity conditions (Fig. 3; black filled dots). We note that  
261 significant growth defects for mutants in these genes was not observed during 15 generations of  
262 growth in LBS medium under aerobic conditions (24). Therefore, these genes are likely required  
263 for robust growth in the HARV, but not for growth in LSMMG versus gravity. Given the  
264 anaerobic environment of the HARV, it seems likely that many of these genes may be required  
265 for optimal growth under anaerobic conditions. This hypothesis is supported by the presence of  
266 four genes of the Na<sup>+</sup>-translocating NADH:quinone oxidoreductase (*nqrA*, *nqrB*, *nqrD*, *nqrE*),  
267 which, in the related species *V. cholerae*, conducts 90% of the membrane NADH  
268 dehydrogenase activity under anaerobic conditions (31, 32). We also note the presence of some  
269 genes that are required for robust symbiosis in this category, including *degS*, *dnaJ*, and *ompU*

270 (24, 33). Given that mutants in these genes exhibited growth defects in both LSMMG and  
271 gravity conditions in the HARVs, our results suggest that colonization in the HARV may proceed  
272 differently than under standard laboratory conditions. Furthermore, we speculate that these  
273 genes may play a role in *V. fischeri* growth under anaerobic conditions.

274

275 A possible limitation of the current study is that the transposon library used was built on agar  
276 plates in a standard microbiology laboratory; i.e., under normal gravity conditions. However,  
277 were this a major limitation, then in Figure 3 we would have observed a large number of  
278 mutants with no defect in gravity but with a defect in LSMMG (e.g., in the top left of the figure).  
279 Not only did we not observe a substantial number of such genes, but they were outnumbered by  
280 the genes that fell in the bottom right. Therefore, we can conclude that the origination of the  
281 library in the gravity condition did not impair our ability to investigate this question.

282

283 We provide a comparison of our INSeq data with previously published RNA-Seq data. As shown  
284 in Figure 5, there is little correlation between gene requirement (INSeq) and gene expression  
285 (RNA-Seq). It is important to consider both gene requirement and gene expression, as genes  
286 that are not induced in a condition may nonetheless be required for growth and/or survival. For  
287 example, a gene that is expressed at a constant level under two conditions may be required for  
288 survival in only one of those conditions. Broader analysis comparing gene requirement and  
289 expression have demonstrated that these categories are often unlinked (34). Our results argue

290 that genes that are induced in simulated microgravity are not preferentially required for bacterial  
291 growth under these conditions.

292

293 Overall, this work establishes which genes were impacted by growth in LSMMG, gravity, or the  
294 HARV environment generally. We additionally determined that microgravity-induced transcripts  
295 do not predict which genes are conditionally essential under this condition. Finally, we  
296 demonstrated that the HARV environment is amenable to high-throughput genetic experiments  
297 and was reproducible within treatments. This study, therefore, provides a solid foundation for  
298 future studies that seek to identify the genetic basis by which bacteria and animals form specific,  
299 robust interactions under conditions of reduced gravity.

300

## 301 **MATERIALS AND METHODS**

302

303 **Media and growth conditions.** *V. fischeri* strains were grown at 25°C in Luria-Bertani salt  
304 (LBS) medium (per liter, 10 g Bacto-tryptone, 5 g yeast extract and 20 g NaCl, 50 ml 1 M Tris  
305 buffer, pH 7.5, in distilled water). When appropriate, antibiotics or supplements were added to  
306 media at the following concentrations: erythromycin, 5 µg/ml; chloramphenicol, 5 µg/ml; X-gal  
307 (5-bromo-4-chloro-3-indolyl-β-D-galactopyranoside), 80 µg/ml. Growth media were solidified  
308 with 1.5% agar as needed.

309

310 **Preparation of input and output samples from HARV growth.** The Lib04 library of pMarVF1  
311 mariner transposon insertions in MJM1100 (ES114) was described previously (24). Twenty-five  
312 microliters of the library (approximately  $2 \times 10^8$  CFU) were inoculated into 5 ml LBS, and grown  
313 at 26 °C for approximately 5 h, to an  $OD_{600}$  of approximately 0.3. Aliquots (552  $\mu$ l) of culture was  
314 transferred to each of eight flasks containing 100 ml LBS (i.e.,  $2^{7.5}$ -fold dilution) and mixed well;  
315 an additional 500  $\mu$ l of input culture was frozen in 17% glycerol (v/v) as the input sample. From  
316 each flask, 50 ml was inoculated into each HARV: LSMMG vessels A, B, C, and D; and gravity  
317 vessels A, B, C, and D. Each vessel D was used to monitor growth rate. Samples were grown  
318 for approximately 5.25 h to an  $OD_{600} \leq 0.3$ ; diluted another  $2^{7.5}$ -fold; grown to a final  $OD_{600}$  of  
319 approximately 0.3, then frozen as the 15-generation output samples. In some cases, HARV  
320 vessels leaked or had significantly reduced growth rate, and those samples were excluded from  
321 further analysis.

322  
323 **INSeq sample preparation.** DNA from the input and output samples was prepared using the  
324 MoBio Biofilm Isolation Kit (Carlsbad, CA). Samples were prepared for INSeq analysis using the  
325 protocol of Goodman et al. (26), with double the BioSamA primer concentration. Samples were  
326 submitted to the Tufts University Core Facility (TUCF) for sequencing on the Illumina HiSeq  
327 2500 (single-end 50 bp reads). The resulting reads were deposited at NCBI SRA under  
328 accession number SRR12394639.

329

330 **Bioinformatic Analysis of INSeq data.** Each sample was processed using the bioinformatic  
331 software pyinseq (<https://github.com/mjmlab/pyinseq>, v0.2.0) to quantify transposon insertions  
332 and then analyzed using Python visualization and statistical modules. Pyinseq starts by  
333 demultiplexing the raw reads using a barcode index and then maps them to the reference  
334 genome (ES114v2: CP000020.2, CP000021.2, CP000022.1) using the short-read aligner  
335 software Bowtie (35) with parameters that allow a single base-pair mismatch. Reads with  
336 multiple alignments (e.g., to the 12 semi-redundant rRNA operons and in tRNA genes) were  
337 excluded. The output alignment files were used to quantify the frequency of reads at each  
338 transposon insertion site (TA dinucleotides, for the mariner transposon). Transposon-insertion  
339 sites were analyzed if they contain a minimum of three reads and have reads from both the left  
340 and right flanking sequence (with a maximum difference of 10-fold abundance for one side over  
341 the other). For each sample, a T50 value was calculated, which is defined as the minimum  
342 number of transposon insertion sites that account for 50% of the reads in that sample. Gene-  
343 level analysis consolidates the site-level data for insertions that fall in the 5'-most 90% of each  
344 gene (-d parameter of 0.9). The pyinseq summary gene table (Table S2) was further analyzed  
345 using pandas, a python module for manipulating large datasets (36, 37). In addition, pandas  
346 was used to calculate spearman correlation values of each pairwise sample comparison. The  
347 technical averages for each sample was further analyzed using DESeq2, an R package that  
348 normalizes the dataset and performs appropriate statistical tests on high-throughput count data  
349 that does not follow a normal distribution such as INSeq (38). DESeq2 was used to estimate the



350 library size, normalize sequencing depth of samples, and calculate variation of each gene for  
351 statistical testing.

352

353 **Transformation of VFS into MJM1100 background.** The VFS mutant collection was  
354 assembled by sequencing random pEVS170 transposon insertions into ES114 (24, 39). Mutant  
355 alleles were moved into the MJM1100 background using transformation under *tfos* induction  
356 (40). Selected VFS strains grown on LBS plates were verified with PCR amplification using  
357 locus-specific primers and transposon-anchored primers MJM-127 (pEVS170 transposon) or  
358 SamA (pMarVF1 transposon) (Table 2). Recipient strain MJM1538 (MJM1100 carrying  
359 *pLostfoX*) was grown overnight in 3 ml of LBS containing 2.5 µg/ml chloramphenicol and then  
360 subcultured 1:100 into 3 ml of Tris Minimal with *N*-acetylglucosamine (GlcNac) for overnight  
361 growth. The recipient was then subcultured 1:50 into fresh Tris-Minimal-GlcNac-Cam with  
362 aeration until the OD<sub>600</sub> reached 0.2-0.3, when 500 µl of recipient culture was incubated with 2.4  
363 µg of VFS donor DNA (prepared with the Qiagen Blood and Tissue kit, Gram-negative bacteria  
364 protocol), followed by a brief vortex, and then static incubation at room temperature for 30 min.  
365 One ml of LBS was added to culture, transferred to a glass culture tube, and incubated  
366 overnight with aeration. The culture was spun down (8000 x *g*, 1 min), 900 µl of supernatant  
367 was removed, and the pellet was resuspended in the remaining ~100 µl of LBS. Aliquots (50 µl)  
368 of each sample were plated on LBS-erythromycin (LBS-Erm; 5 µg/ml) and three candidates  
369 were selected. Colonies were restreaked on LBS-Erm plates and then patched on selective  
370 media to check for absence of *pLostfoX* (LBS-Cam<sup>S</sup>) and the presence of the transformed DNA

371 (LBS-Erm<sup>R</sup>). Transformation was verified with PCR amplification using primers that target the  
372 transposon junction and the gene target (Table 2).

373

374 **Competitions of individual gene mutants with a marked parental strain in the HARVs.**

375 The competitive fitness of seven transposon mutants (Table 1) was evaluated in one-  
376 on-one competition assays against the LacZ-expressing wild type, MJM1575, in the  
377 HARV vessels. Overnight cultures of each strain were prepared in LBS with shaking at  
378 25 °C and diluted 1:100 in fresh medium the following morning. After 2 h of growth at 25  
379 °C with shaking, the mutant and wild-type subcultures were normalized by OD<sub>600</sub> and  
380 combined at a 1:1 ratio in fresh LBS. The resultant starting culture was subsequently  
381 loaded into the HARV vessel. At this time, two samples of the mixed input culture were  
382 collected: the first was preserved in 33% glycerol (v/v) and stored at -80 °C for later  
383 analysis, whereas the second was serially diluted in PBS (pH 7.0) and plated on LBS-  
384 Xgal agar (2 mg/ml) to reveal the starting ratio of mutant:control, based on the  
385 proportion of white-to-blue colonies, as previously described (24). In the HARVs, the  
386 mutant and marked wild type were grown in competition with each other under LSMMG  
387 or gravity conditions for approximately 10 generations at 25 °C and 13 rpm. After 10  
388 doublings, which was determined by OD<sub>600</sub>, samples of the output cultures were  
389 preserved in 33% glycerol (v/v) and stored at -80 °C. The input and output samples  
390 were plated on LBS-Xgal agar to calculate the competitive index for each sample. The

391 competitive index is equal to the  $\text{Log}_{10}$  value of the mutant/wild type ratio after  
392 competition normalized to its measured ratio at the beginning of the competition.

393

394 **DATA AVAILABILITY**

395 Illumina data for the INSeq reads are available at NCBI SRA, Accession number  
396 SRR12394639.

397

398 **TABLES**

399

400 **Table 1. *V. fischeri* strains used in this study.**

| Strain  | Genotype                                                         | Reference/Source |
|---------|------------------------------------------------------------------|------------------|
| MJM1100 | Wild-type ES114                                                  | (41, 42)         |
| MJM1538 | MJM1100/pLostfoX                                                 | (43)             |
| MJM1575 | MJM1100/pVSV103                                                  | (27, 44)         |
| MJM3801 | MJM1100 <i>sspA</i> :: <i>Tnerm</i> (transformed from VFS025D03) | This work        |
| MJM3802 | MJM1100 <i>mukB</i> :: <i>Tnerm</i> (transformed from VFS001A10) | This work        |
| MJM3804 | MJM1100 <i>ruvB</i> :: <i>Tnerm</i> (transformed from VFS020B09) | This work        |
| MJM3805 | MJM1100 <i>brnQ</i> :: <i>Tnerm</i> (transformed from VFS022E03) | This work        |
| MJM3807 | MJM1100 <i>nhaR</i> :: <i>Tnerm</i> (transformed from VFS022G01) | This work        |
| MJM3808 | MJM1100 <i>ubiH</i> :: <i>Tnerm</i> (transformed from MJM1976)   | This work        |
| MJM3809 | MJM1100 <i>hsiO</i> :: <i>Tnerm</i> (transformed from MJM1628)   | This work        |

401

402

403

404 **Table 2. Oligonucleotide primers**

| <b>Name</b>          | <b>Sequence (5`-3`)</b>        | <b>Source</b> |
|----------------------|--------------------------------|---------------|
| MJM-127              | ACAAGCATAAAGCTTGCTCAATCAATCACC | (45)          |
| SamA                 | AAGCAGAAGACGGCATAACGAAGACC     | (26)          |
| EB01 ( <i>sspA</i> ) | AACGGAGCTAAGTAACAATCCACT       | This work     |
| EB02 ( <i>mukB</i> ) | CACCTAGTGTATCAGCAAGACCTT       | This work     |
| EB03 ( <i>ruvB</i> ) | TCACTCGCTTTCAATTA ACTCAGC      | This work     |
| EB06 ( <i>bmQ</i> )  | CAGCAACTTTCGCAGCATCTAATA       | This work     |
| EB08 ( <i>nhaR</i> ) | TTGTAAGTCCATATAGACGCCAC        | This work     |
| EB10 ( <i>hslO</i> ) | AACATGGTTGATGGAGGTAAAGTT       | This work     |
| EB11 ( <i>ubiH</i> ) | CAAATTCAATCTTAGCAAAGCTGTC      | This work     |

405

406

407

408

409

410

411 **FIGURES**

412

413 **Figure 1. Experimental setup for bacterial mutant enrichment in HARV vessels to model**

414 **microgravity (LSMMG) and to have the control gravity condition.** INSeq libraries were

415 grown in HARV vessels that can simulate microgravity when placed perpendicular or gravity

416 when horizontal. Mutants exhibited either no defects in either condition, or exhibited (1) a growth

417 defect in both conditions, (2) LSMMG defect, (3) or a gravity-specific defect.

418

419 **Figure 2. Pairwise correlation between samples revealed a clear difference between input**

420 **samples and output samples from the HARV conditions .** Spearman correlations between

421 samples, in which the normalized transposon insertion counts in each gene were compared.

422 Input replicates were the original INSeq library grown for inoculation into the HARV, and low-

423 shear modeled microgravity (LSMMG) and normal gravity replicates were outputs from the

424 respective HARV-grown experiments.

425

426 **Figure 3. Mutant behavior under LSMMG or gravity revealed fitness in each HARV**

427 **condition, normalized to the input transposon sequencing library.** A) Comparison scatter

428 plot of microgravity (x-axis) and gravity (y-axis) Log(Fold-Change) values. Counts for each gene

429 for each replicate were normalized and used to calculate Log<sub>10</sub>(Fold-Change) values as

430 described in Materials and Methods. Genes that were poorly represented in the input pool did

431 not exhibit significant depletion, or were previously determined to be growth deficient in LBS

432 medium were designated as open black circles. Filled black circles are genes that were  
433 significantly ( $p$ -value  $< 0.05$ ) depleted 2-fold change under both simulated microgravity and  
434 gravity conditions. Genes that are filled red were significant in both conditions but more depleted  
435 under gravity, whereas open red circles are exclusively significant in gravity. Filled blue genes  
436 are significant in both but more depleted under simulated microgravity. Remaining genes are  
437 shown as open black circles.

438

439 **Figure 4. Competition of defined mutants provided validation of mutant fitness from**  
440 **within the complex INSeq library.** Mutants were competed against wild-type *V. fischeri* under  
441 simulated microgravity and gravity using the HARV vessels. Dots represent fold-change for 1:1  
442 competition of mutant vs. marked parental strain (MJM1575).

443

444 **Figure 5. Gene expression (RNA-Seq) does not predict conditional gene requirement**  
445 **(INSeq) under LSMMG conditions.** INSeq (y-axis) and RNA-Seq (x-axis) were compared by  
446 using log-normalized fold-change values for different experimental conditions. A) INSeq  
447 (LSMMG/Gravity) was compared to a previously published RNA-Seq (LSMMG/Gravity) under  
448 HARV conditions and had an  $R^2$  of 0.08. We also calculated fold-changes for RNA-Seq HARV  
449 conditions using a dataset from SWT medium. B) INSeq (Gravity/Input) were compared to RNA-  
450 Seq (Gravity/SWT) and had an  $R^2$  of 0.18. C) INSeq (LSMMG/Input) was compared to RNA-  
451 Seq (LSMMG/SWT) and had an  $R^2$  0.11.

452

453 **SUPPLEMENTAL DATA**

454 The file Supplemental\_Tables.xlsx includes the following tables:

455 Table S1: INSeq sample details

456 Table S2: Summary gene table output from pyinseq

457 Table S3: List of genes depleted as shown in Figure 3

458

459

460 **ACKNOWLEDGMENTS**

461 We acknowledge Cheryl Whistler and Randi Foxall for VFS Library mutants and A. Murat Eren

462 and his laboratory for technical advice and mentorship. Funding was provided by NASA's Illinois

463 Space Grant Consortium Research Seed Grant (M.J.M.), NIGMS R35 GM119627 (M.J.M.), an

464 American Society for Microbiology Undergraduate Research Fellowship (E.B.), and the McNair

465 Scholars Program (E.B.). The project was also supported in part by a NASA Space Biology

466 award 80NSSC18K1465 (J.S.F.).

467

468

469



470 **REFERENCES**

- 471 1. Foster JS, Khodadad CLM, Ahrendt SR, Parrish ML. 2013. Impact of simulated  
472 microgravity on the normal developmental time line of an animal-bacteria symbiosis. Sci  
473 Rep 3:srep01340.
- 474 2. Voorhies AA, Lorenzi HA. 2016. The Challenge of Maintaining a Healthy Microbiome during  
475 Long-Duration Space Missions. *Frontiers in Astronomy and Space Sciences* 3:23.
- 476 3. Casaburi G, Goncharenko-Foster I, Duscher AA, Foster JS. 2017. Transcriptomic changes  
477 in an animal-bacterial symbiosis under modeled microgravity conditions. *Sci Rep* 7:46318.
- 478 4. Castro-Wallace S, Stahl S, Voorhies A, Lorenzi H, Douglas GL. 2017. Response of  
479 *Lactobacillus acidophilus* ATCC 4356 to low-shear modeled microgravity. *Acta Astronaut*  
480 139:463–468.
- 481 5. Shao D, Yao L, Riaz MS, Zhu J, Shi J, Jin M, Huang Q, Yang H. 2017. Simulated  
482 microgravity affects some biological characteristics of *Lactobacillus acidophilus*. *Appl*  
483 *Microbiol Biotechnol* 101:3439–3449.
- 484 6. Duscher AA, Conesa A, Bishop M, Vroom MM, Zubizarreta SD, Foster JS. 2018.  
485 Transcriptional profiling of the mutualistic bacterium *Vibrio fischeri* and an *hfq* mutant under  
486 modeled microgravity. *npj Microgravity* 4:25.
- 487 7. Garrett-Bakelman FE, Darshi M, Green SJ, Gur RC, Lin L, Macias BR, McKenna MJ,  
488 Meydan C, Mishra T, Nasrini J, Piening BD, Rizzardi LF, Sharma K, Siamwala JH, Taylor L,  
489 Vitaterna MH, Afkarian M, Afshinnikoo E, Ahadi S, Ambati A, Arya M, Bezdán D, Callahan  
490 CM, Chen S, Choi AMK, Chlipala GE, Contrepois K, Covington M, Crucian BE, De Vivo I,

- 491 Dinges DF, Ebert DJ, Feinberg JI, Gandara JA, George KA, Goutsias J, Grills GS, Hargens  
492 AR, Heer M, Hillary RP, Hoofnagle AN, Hook VYH, Jenkinson G, Jiang P, Keshavarzian A,  
493 Laurie SS, Lee-McMullen B, Lumpkins SB, MacKay M, Maienschein-Cline MG, Melnick  
494 AM, Moore TM, Nakahira K, Patel HH, Pietrzyk R, Rao V, Saito R, Salins DN, Schilling JM,  
495 Sears DD, Sheridan CK, Stenger MB, Tryggvadottir R, Urban AE, Vaisar T, Van Espen B,  
496 Zhang J, Ziegler MG, Zwart SR, Charles JB, Kundrot CE, Scott GBI, Bailey SM, Basner M,  
497 Feinberg AP, Lee SMC, Mason CE, Mignot E, Rana BK, Smith SM, Snyder MP, Turek FW.  
498 2019. The NASA Twins Study: A multidimensional analysis of a year-long human  
499 spaceflight. *Science* 364.
- 500 8. Chang D, Zhu Y, An L, Liu J, Su L, Guo Y, Chen Z, Wang Y, Wang L, Wang J, Li T, Fang  
501 X, Fang C, Yang R, Liu C. 2013. A multi-omic analysis of an *Enterococcus faecium* mutant  
502 reveals specific genetic mutations and dramatic changes in mRNA and protein expression.  
503 *BMC Microbiol* 13:304.
- 504 9. Wilson JW, Ott CM, Quick L, Davis R, Höner zu Bentrup K, Crabbé A, Richter E, Sarker S,  
505 Barrila J, Porwollik S, Cheng P, McClelland M, Tsapraillis G, Radabaugh T, Hunt A, Shah  
506 M, Nelman-Gonzalez M, Hing S, Parra M, Dumars P, Norwood K, Bober R, Devich J,  
507 Ruggles A, CdeBaca A, Narayan S, Benjamin J, Goulart C, Rupert M, Catella L, Schurr MJ,  
508 Buchanan K, Morici L, McCracken J, Porter MD, Pierson DL, Smith SM, Mergeay M, Leys  
509 N, Stefanyshyn-Piper HM, Gorie D, Nickerson CA. 2008. Media ion composition controls  
510 regulatory and virulence response of *Salmonella* in spaceflight. *PLoS One* 3:e3923.
- 511 10. Nickerson CA, Ott CM, Wilson JW, Ramamurthy R, Pierson DL. 2004. Microbial responses

- 512 to microgravity and other low-shear environments. *Microbiol Mol Biol Rev* 68:345–361.
- 513 11. Schwarz RP, Goodwin TJ, Wolf DA. 1992. Cell culture for three-dimensional modeling in  
514 rotating-wall vessels: an application of simulated microgravity. *J Tissue Cult Methods*  
515 14:51–57.
- 516 12. Fang A, Pierson DL, Koenig DW, Mishra SK, Demain AL. 1997. Effect of simulated  
517 microgravity and shear stress on microcin B17 production by *Escherichia coli* and on its  
518 excretion into the medium. *Appl Environ Microbiol* 63:4090–4092.
- 519 13. Demain AL, Fang A. 2001. Secondary metabolism in simulated microgravity. *Chem Rec*  
520 1:333–346.
- 521 14. Castro SL, Nelman-Gonzalez M, Nickerson CA, Mark Ott C. 2011. Induction of Attachment-  
522 Independent Biofilm Formation and Repression of *hfq* Expression by Low-Fluid-Shear  
523 Culture of *Staphylococcus aureus*. *Appl Environ Microbiol* 77:6368–6378.
- 524 15. Wang H, Yan Y, Rong D, Wang J, Wang H, Liu Z, Wang J, Yang R, Han Y. 2016.  
525 Increased biofilm formation ability in *Klebsiella pneumoniae* after short-term exposure to a  
526 simulated microgravity environment. *Microbiologyopen* 5:793–801.
- 527 16. Abshire CF, Prasai K, Soto I, Shi R, Concha M, Baddoo M, Flemington EK, Ennis DG, Scott  
528 RS, Harrison L. 2016. Exposure of *Mycobacterium marinum* to low-shear modeled  
529 microgravity: effect on growth, the transcriptome and survival under stress. *NPJ*  
530 *Microgravity* 2:16038.
- 531 17. Mandel MJ. 2010. Models and approaches to dissect host-symbiont specificity. *Trends*  
532 *Microbiol* 18:504–511.

- 533 18. Jones BW, Nishiguchi MK. 2004. Counterillumination in the Hawaiian bobtail squid,  
534 *Euprymna scolopes* Berry (Mollusca: Cephalopoda). *Mar Biol* 144:1151–1155.
- 535 19. Koropatnick TA, Engle JT, Apicella MA, Stabb EV, Goldman WE, McFall-Ngai MJ. 2004.  
536 Microbial factor-mediated development in a host-bacterial mutualism. *Science* 306:1186–  
537 1188.
- 538 20. Mandel MJ, Wollenberg MS, Stabb EV, Visick KL, Ruby EG. 2009. A single regulatory gene  
539 is sufficient to alter bacterial host range. *Nature* 458:215–218.
- 540 21. Mandel MJ, Schaefer AL, Brennan CA, Heath-Heckman EAC, Deloney-Marino CR, McFall-  
541 Ngai MJ, Ruby EG. 2012. Squid-derived chitin oligosaccharides are a chemotactic signal  
542 during colonization by *Vibrio fischeri*. *Appl Environ Microbiol* 78:4620–4626.
- 543 22. Brooks JF 2nd, Mandel MJ. 2016. The histidine kinase BinK Is a negative regulator of  
544 biofilm formation and squid colonization. *J Bacteriol* 198:2596–2607.
- 545 23. Foster JS, Kerney KR, Parrish ML, Khodadad CLM, Ahrendt SR. 2011. Potential of the  
546 *Euprymna/Vibrio* symbiosis as a model to assess the impact of microgravity on bacteria-  
547 induced animal development. *Gravitational and Space Research* 25:44–47.
- 548 24. Brooks JF 2nd, Gyllborg MC, Cronin DC, Quillin SJ, Mallama CA, Foxall R, Whistler C,  
549 Goodman AL, Mandel MJ. 2014. Global discovery of colonization determinants in the squid  
550 symbiont *Vibrio fischeri*. *Proc Natl Acad Sci U S A* 111:17284–17289.
- 551 25. Goodman AL, McNulty NP, Zhao Y, Leip D, Mitra RD, Lozupone CA, Knight R, Gordon JL.  
552 2009. Identifying genetic determinants needed to establish a human gut symbiont in its  
553 habitat. *Cell Host Microbe* 6:279–289.

- 554 26. Goodman AL, Wu M, Gordon JI. 2011. Identifying microbial fitness determinants by  
555 insertion sequencing using genome-wide transposon mutant libraries. *Nat Protoc* 6:1969–  
556 1980.
- 557 27. Dunn AK, Millikan DS, Adin DM, Bose JL, Stabb EV. 2006. New *rfp*- and pES213-derived  
558 tools for analyzing symbiotic *Vibrio fischeri* reveal patterns of infection and *lux* expression in  
559 situ. *Appl Environ Microbiol* 72:802–810.
- 560 28. Thompson LR, Nikolakakis K, Pan S, Reed J, Knight R, Ruby EG. 2017. Transcriptional  
561 characterization of *Vibrio fischeri* during colonization of juvenile *Euprymna scolopes*.  
562 *Environ Microbiol* 19:1845–1856.
- 563 29. Meeske AJ, Riley EP, Robins WP, Uehara T, Mekalanos JJ, Kahne D, Walker S, Kruse AC,  
564 Bernhardt TG, Rudner DZ. 2016. SEDS proteins are a widespread family of bacterial cell  
565 wall polymerases. *Nature* 537:634–638.
- 566 30. Joyce AR, Reed JL, White A, Edwards R, Osterman A, Baba T, Mori H, Lesely SA, Palsson  
567 BØ, Agarwalla S. 2006. Experimental and computational assessment of conditionally  
568 essential genes in *Escherichia coli*. *J Bacteriol* 188:8259–8271.
- 569 31. Casutt MS, Schlosser A, Buckel W, Steuber J. 2012. The single NqrB and NqrC subunits in  
570 the Na<sup>+</sup>-translocating NADH: quinone oxidoreductase (Na<sup>+</sup>-NQR) from *Vibrio cholerae* each  
571 carry one covalently attached FMN. *Biochim Biophys Acta* 1817:1817–1822.
- 572 32. Steuber J, Halang P, Vorburger T, Steffen W, Vohl G, Fritz G. 2014. Central role of the Na<sup>+</sup>-  
573 translocating NADH:quinone oxidoreductase (Na<sup>+</sup>-NQR) in sodium bioenergetics of *Vibrio*  
574 *cholerae*. *Biol Chem* 395:1389–1399.

- 575 33. Aeckersberg F, Lupp C, Feliciano B, Ruby EG. 2001. *Vibrio fischeri* outer membrane  
576 protein OmpU plays a role in normal symbiotic colonization. *J Bacteriol* 183:6590–6597.
- 577 34. Turner KH, Everett J, Trivedi U, Rumbaugh KP, Whiteley M. 2014. Requirements for  
578 *Pseudomonas aeruginosa* acute burn and chronic surgical wound infection. *PLoS Genet*  
579 10:e1004518.
- 580 35. Langmead B, Trapnell C, Pop M, Salzberg SL. 2009. Ultrafast and memory-efficient  
581 alignment of short DNA sequences to the human genome. *Genome Biol* 10:R25.
- 582 36. Reback J, McKinney W, jbrockmendel, Van den Bossche J, Augspurger T, Cloud P,  
583 gyoung, Sinhrks, Klein A, Hawkins S, Roeschke M, Tratner J, She C, Ayd W, Petersen T,  
584 MomIsBestFriend, Garcia M, Schendel J, Hayden A, Jancauskas V, Battiston P, Saxton D,  
585 Seabold S, McMaster A, chris-b, h-vetinari, Hoyer S, Dong K, Overmeire W, Winkel M.  
586 2020. pandas-dev/pandas: Pandas 1.1.0.
- 587 37. McKinney W, Others. 2010. Data structures for statistical computing in python, p. 51–56. *In*  
588 *Proceedings of the 9th Python in Science Conference*. Austin, TX.
- 589 38. Love MI, Huber W, Anders S. 2014. Moderated estimation of fold change and dispersion for  
590 RNA-seq data with DESeq2. *Genome Biol* 15:550.
- 591 39. Lyell NL, Dunn AK, Bose JL, Vescovi SL, Stabb EV. 2008. Effective Mutagenesis of *Vibrio*  
592 *fischeri* by Using Hyperactive Mini-Tn5 Derivatives. *Appl Environ Microbiol* 74:7059–7063.
- 593 40. Pollack-Berti A, Wollenberg MS, Ruby EG. 2010. Natural transformation of *Vibrio fischeri*  
594 requires *tfoX* and *tfoY*. *Environ Microbiol* 12:2302–2311.
- 595 41. Boettcher KJ, Ruby EG. 1990. Depressed light emission by symbiotic *Vibrio fischeri* of the

- 596           sepiolid squid *Euprymna scolopes*. J Bacteriol 172:3701–3706.
- 597   42. Mandel MJ, Stabb EV, Ruby EG. 2008. Comparative genomics-based investigation of  
598           resequencing targets in *Vibrio fischeri*: focus on point miscalls and artefactual expansions.  
599           BMC Genomics 9:138.
- 600   43. Brooks JF 2nd, Gyllborg MC, Kocher AA, Markey LEH, Mandel MJ. 2015. TfoX-based  
601           genetic mapping identifies *Vibrio fischeri* strain-level differences and reveals a common  
602           lineage of laboratory strains. J Bacteriol 197:1065–1074.
- 603   44. Post DMB, Yu L, Krasity BC, Choudhury B, Mandel MJ, Brennan CA, Ruby EG, McFall-  
604           Ngai MJ, Gibson BW, Apicella MA. 2012. O-antigen and core carbohydrate of *Vibrio fischeri*  
605           lipopolysaccharide: composition and analysis of their role in *Euprymna scolopes* light organ  
606           colonization. J Biol Chem 287:8515–8530.
- 607   45. Studer SV, Mandel MJ, Ruby EG. 2008. AinS quorum sensing regulates the *Vibrio fischeri*  
608           acetate switch. J Bacteriol 190:5915–5923.
- 609

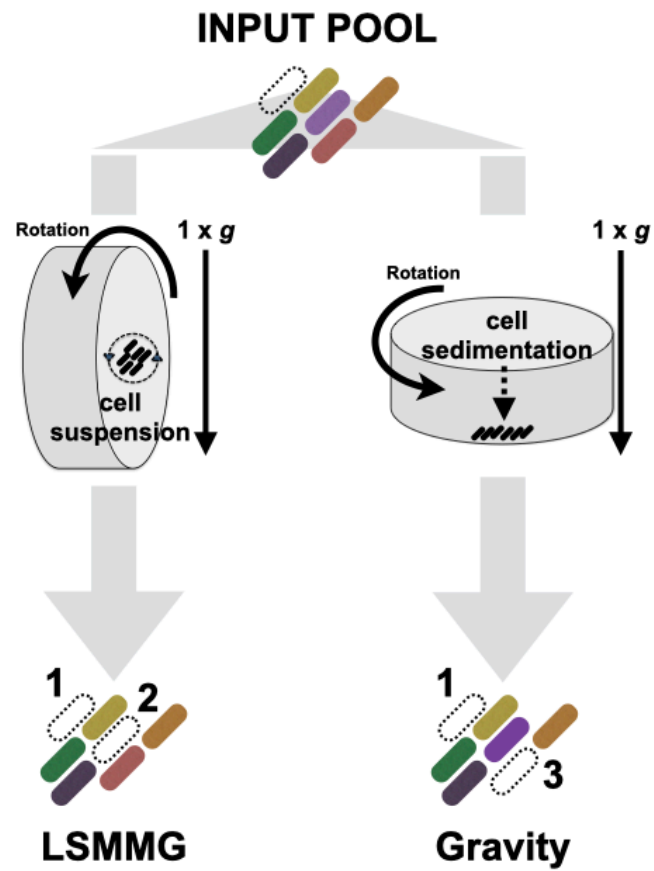





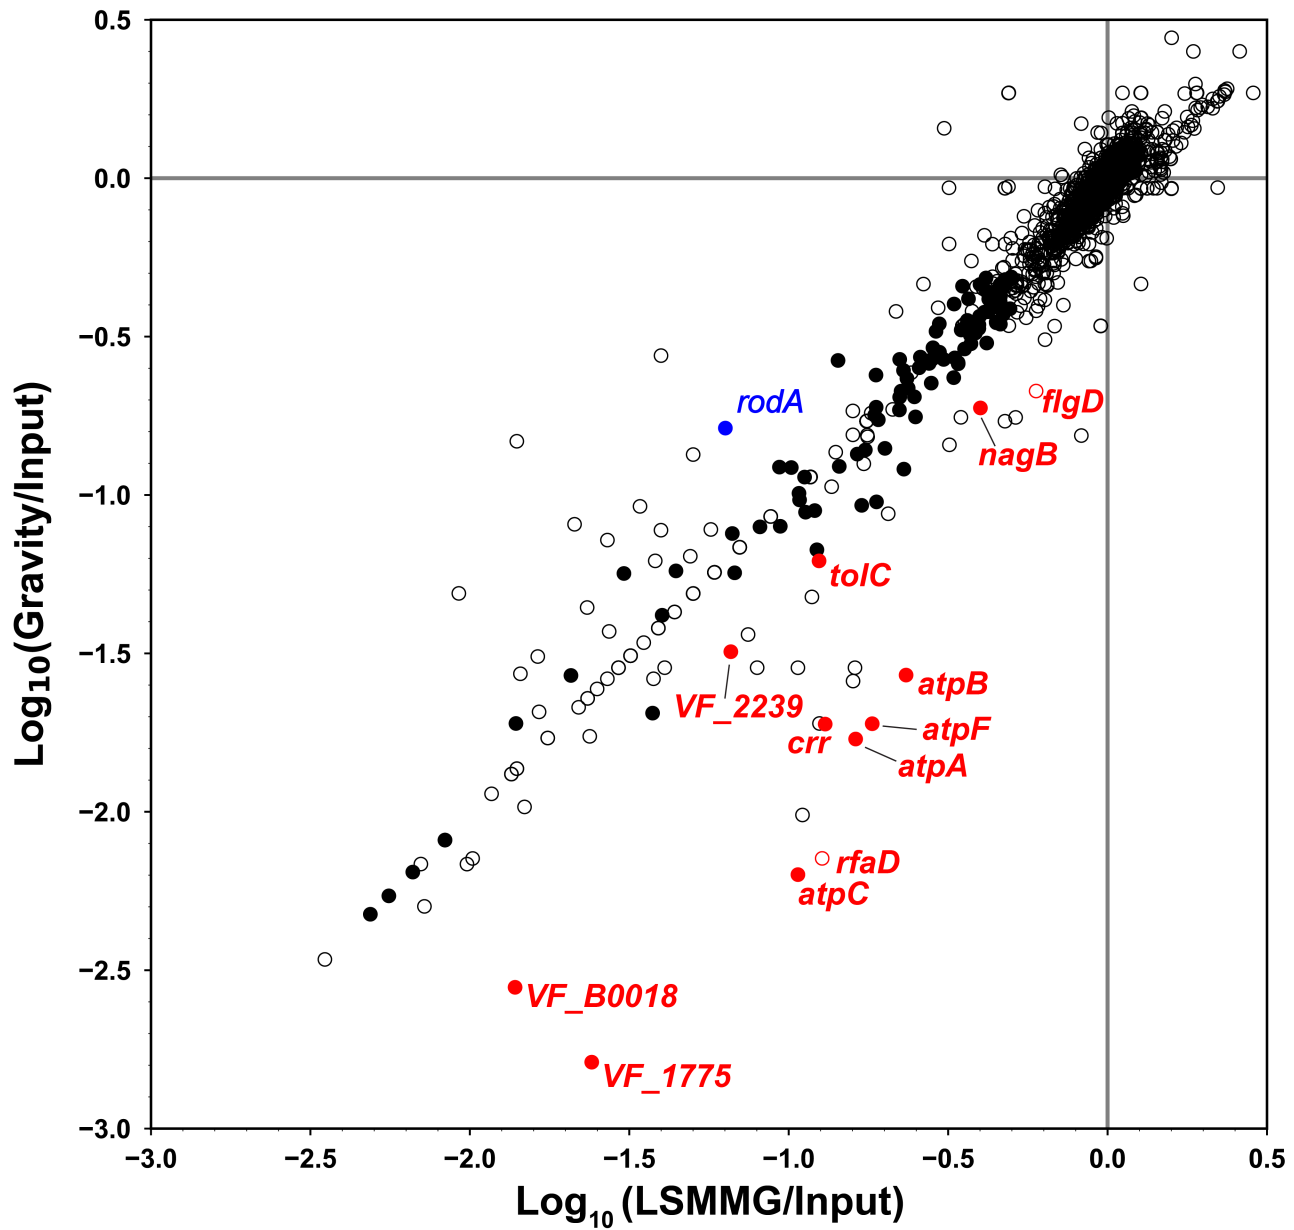

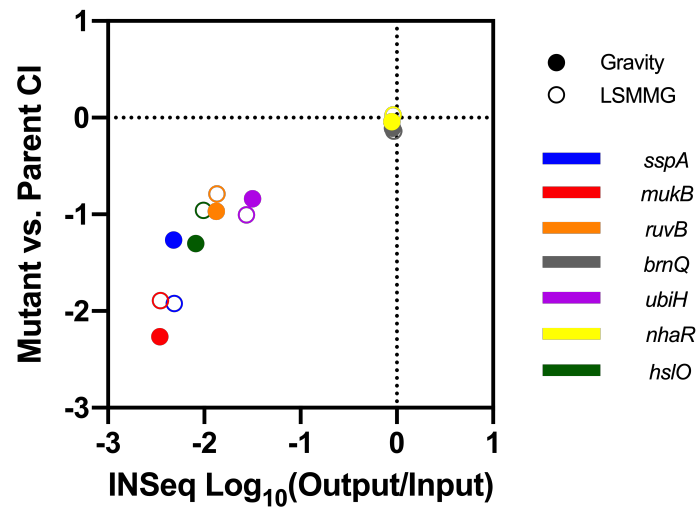

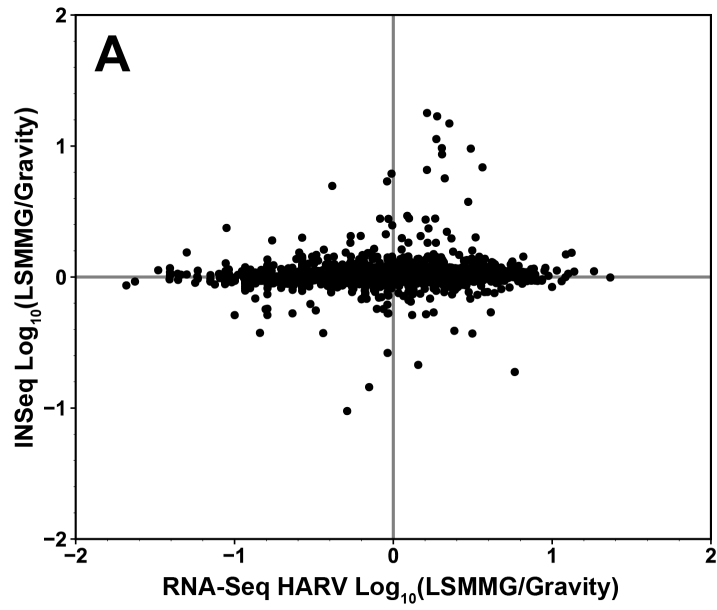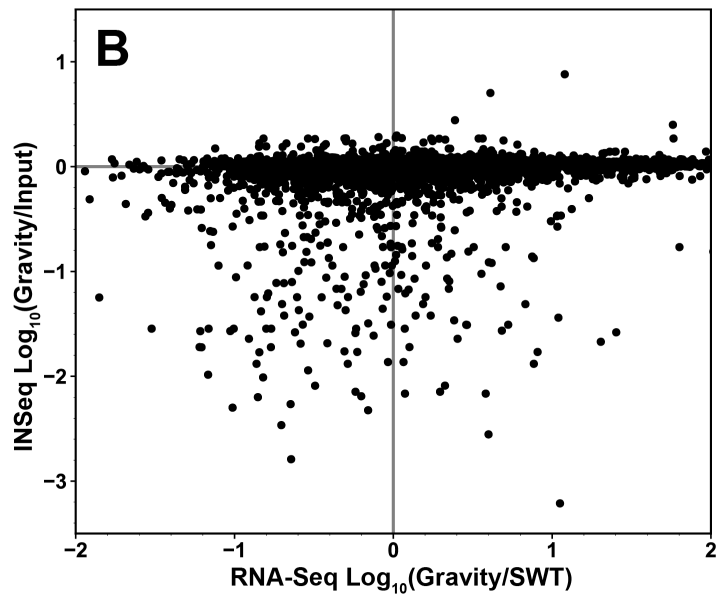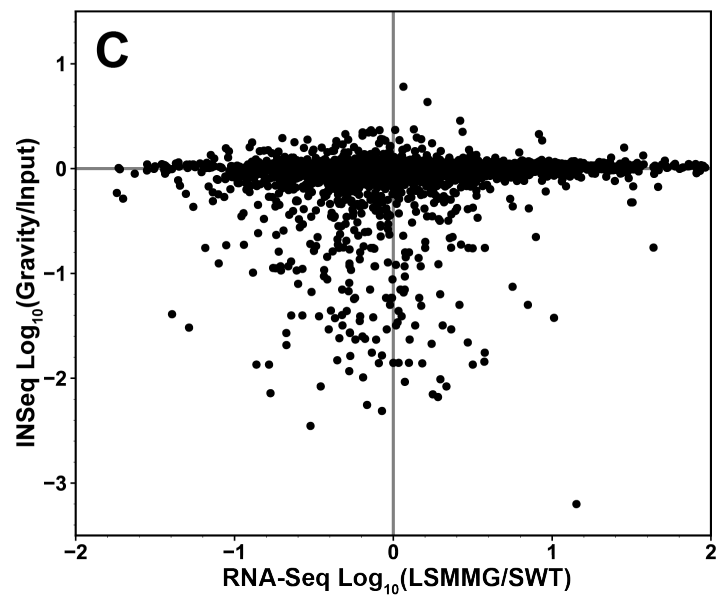

Source: http://biorxiv.org/content/10.1101/2020.08.13.250431v1.full.pdf
